# Supplementary material
Source: PubMed Central journal article supplement (PMC6103907)
Supplement: NIHMS978973-supplement-1.pdf [file NIHMS978973-supplement-1.pdf]

## **Supplemental Data:**

### **A pilot study to investigate the immune modulatory effects of fasting in steroid-naïve mild asthmatics**

Kim Han,<sup>\*</sup> An Nguyen,<sup>\*</sup> Javier Traba,<sup>\*</sup> Xianglan Yao,<sup>†</sup> Maryann Kaler,<sup>†</sup> Rebecca D. Huffstutler,<sup>†</sup> Stewart J. Levine,<sup>†</sup> and Michael N. Sack<sup>\*</sup>

<sup>\*</sup>Cardiovascular and <sup>†</sup>Pulmonary Branches, National Heart, Lung, and Blood Institute, National Institutes of Health, Bethesda, MD, USA

**Supplementary Table. Complete blood count with differential collected in fasting and refeeding state.**

| <b>Blood Cell Type</b> | <b>Condition</b> | <b>Unit</b>                                    | <b>Steroid-naive<br/>(n=10)</b> | <b>Steroid-dependent<br/>(n=8)</b> |
|------------------------|------------------|------------------------------------------------|---------------------------------|------------------------------------|
| WBC                    | Fasted           | Absolute (10 <sup>3</sup> /ul)                 | 5.16 ± 1.16                     | 5.81 ± 2.1                         |
|                        | Refed            | Absolute (10 <sup>3</sup> /ul)                 | 5.82 ± 1.09                     | 6.6 ± 1.73                         |
| Lymphocytes            | Fasted           | Relative (%)<br>Absolute (10 <sup>3</sup> /ul) | 32.92 ± 10.58<br>1.65 ± 0.51    | 33.78 ± 9.0<br>1.95 ± 0.86         |
|                        | Refed            | Relative (%)<br>Absolute (10 <sup>3</sup> /ul) | 28.96 ± 8.1<br>1.67 ± 0.48      | 30.21 ± 9.19<br>1.96 ± 0.68        |
| Monocytes              | Fasted           | Relative (%)<br>Absolute (10 <sup>3</sup> /ul) | 7.77 ± 1.25<br>0.40 ± 0.1       | 7.78 ± 1.72<br>0.43 ± 0.09         |
|                        | Refed            | Relative (%)<br>Absolute (10 <sup>3</sup> /ul) | 7.57 ± 1.36<br>0.43 ± 0.06      | 7.14 ± 1.44<br>0.46 ± 0.11         |
| Neutrophils            | Fasted           | Relative (%)<br>Absolute (10 <sup>3</sup> /ul) | 55.30 ± 9.67<br>2.9 ± 0.97      | 51.29 ± 9.07<br>3.02 ± 1.32        |
|                        | Refed            | Relative (%)<br>Absolute (10 <sup>3</sup> /ul) | 60.12 ± 7.91<br>3.52 ± 0.88     | 57.66 ± 9.13<br>3.85 ± 1.27        |
| Eosinophils            | Fasted           | Relative (%)<br>Absolute (10 <sup>3</sup> /ul) | 3.09 ± 1.83<br>0.16 ± 0.12      | 5.81 ± 3.54*<br>0.33 ± 0.2*        |
|                        | Refed            | Relative (%)<br>Absolute (10 <sup>3</sup> /ul) | 2.53 ± 1.59<br>0.15 ± 0.11      | 3.94 ± 2.29<br>0.27 ± 0.18         |
| Basophils              | Fasted           | Relative (%)<br>Absolute (10 <sup>3</sup> /ul) | 0.63 ± 0.33<br>0.03 ± 0.02      | 1.08 ± 0.57*<br>0.06 ± 0.02*       |
|                        | Refed            | Relative (%)<br>Absolute (10 <sup>3</sup> /ul) | 0.57 ± 0.24<br>0.03 ± 0.01      | 0.51 ± 0.39<br>0.05 ± 0.02*        |

Data are mean ± standard deviation (SD). The p values were calculated using paired student t-test analysis. \*, p<0.05 vs. Steroid-naive asthmatics. Also note that p = ns comparing fasting vs. re-feeding for both steroid-naïve and steroid-dependent groups. WBC, white blood count.

## Supplemental Figures and Figure Legends

### Supplemental Fig 1

#### Supplemental Figure 1

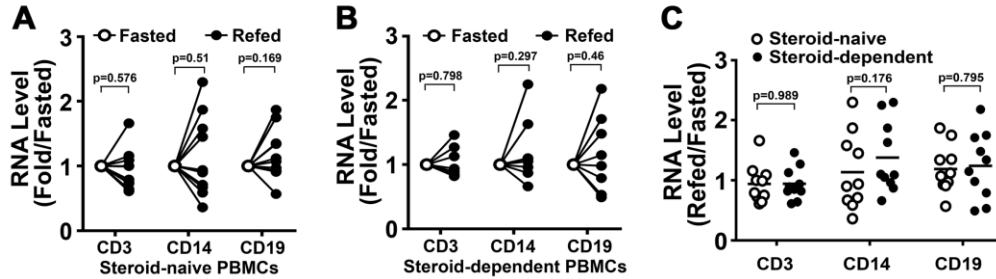

**Supplemental Fig 1.** Expression level of genes encoding cell surface receptors from RNA extracted from PBMCs. (A-B) Relative mRNA expression in primary PBMCs isolated from steroid-naïve (n=10) and steroid-dependent (n=8) asthmatics. Fasting data is normalized to = 1 and the refed transcript levels are represented as fold difference compared to fasted expression levels (C) Fold change in transcript levels at the ratio of refed/fasted comparing steroid-naïve to steroid-dependent asthmatic subjects. CD3, CD14, and CD19 transcript encode for canonical T-cell, monocyte and B-cell surface receptors respectively. Statistical analysis using paired student t-test with p values shown in each panel.

## Supplemental Figure 2

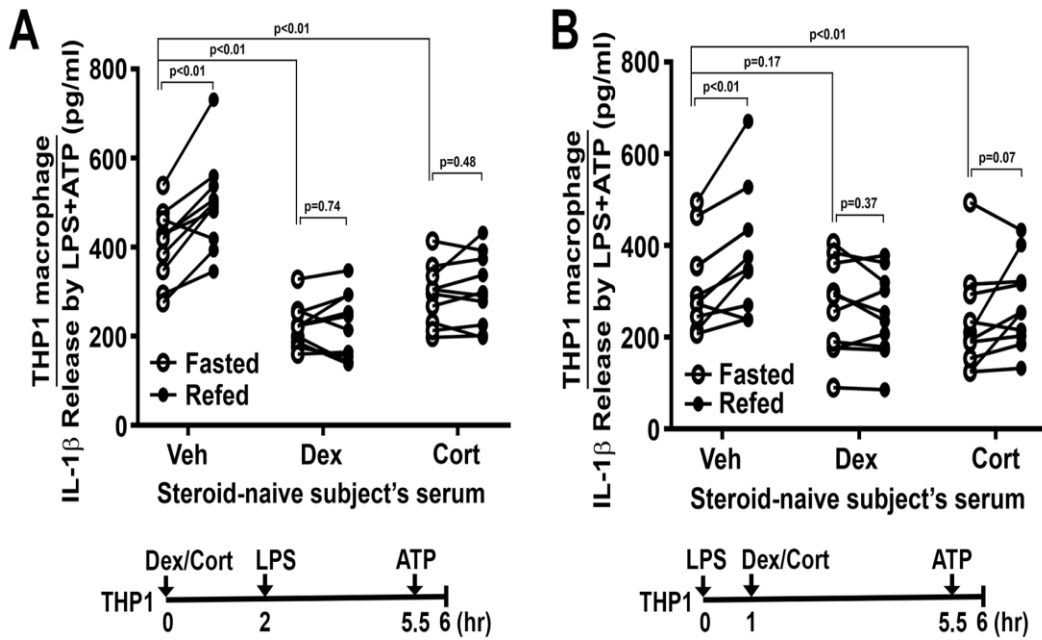

**Supplemental Fig 2.** IL-1 $\beta$  release from THP-1 macrophages with steroid-native asthmatic subjects serum supplemented with Dexamethasone or Cortisol. **(A-B)** The absolute levels of IL-1 $\beta$  release was assessed by ELISA following initial exposure to 100 nM dexamethasone (Dex), 500 nM cortisol (Cort) or vehicle (Veh) control in the context of inflammasome activation with 10 ng/ml LPS and 5 mM ATP administration. The course of administration of the various compounds with their temporal introduction is shown in a schematic below the line graphs. Statistical analysis using paired student t-test with p values shown in each panel.
